# Supplementary material for: mRNA and microRNA analysis reveals modulation of biochemical pathways related to addiction in the ventral tegmental area of methamphetamine self-administering rats
Source: PubMed Central journal article supplement (PMC4506769; doi:10.1186/s12868-015-0186-y), 2015-07-19

# control

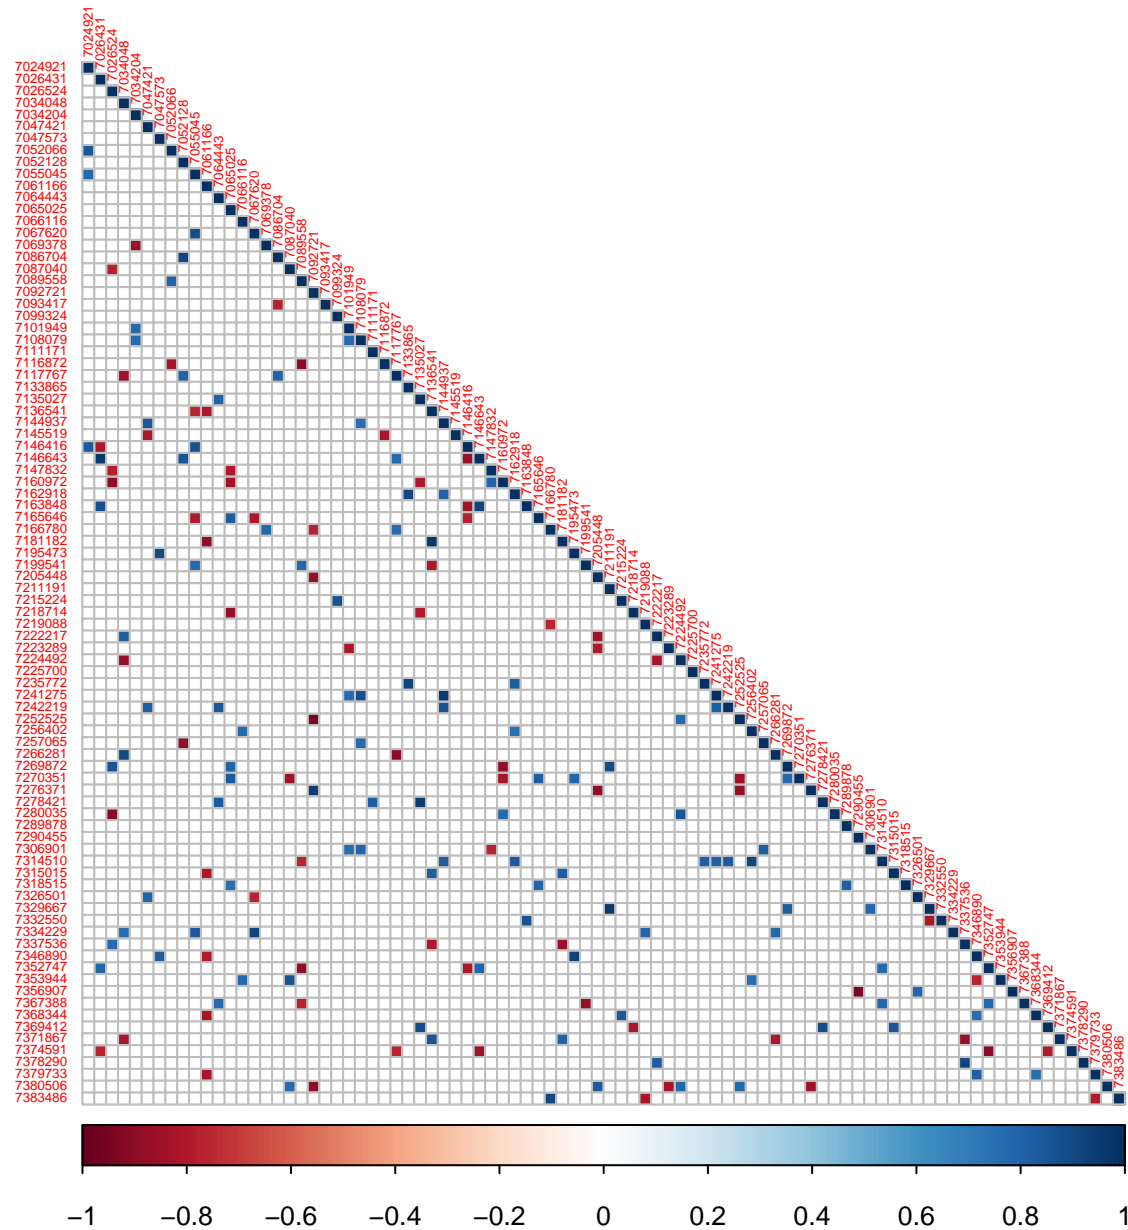

both

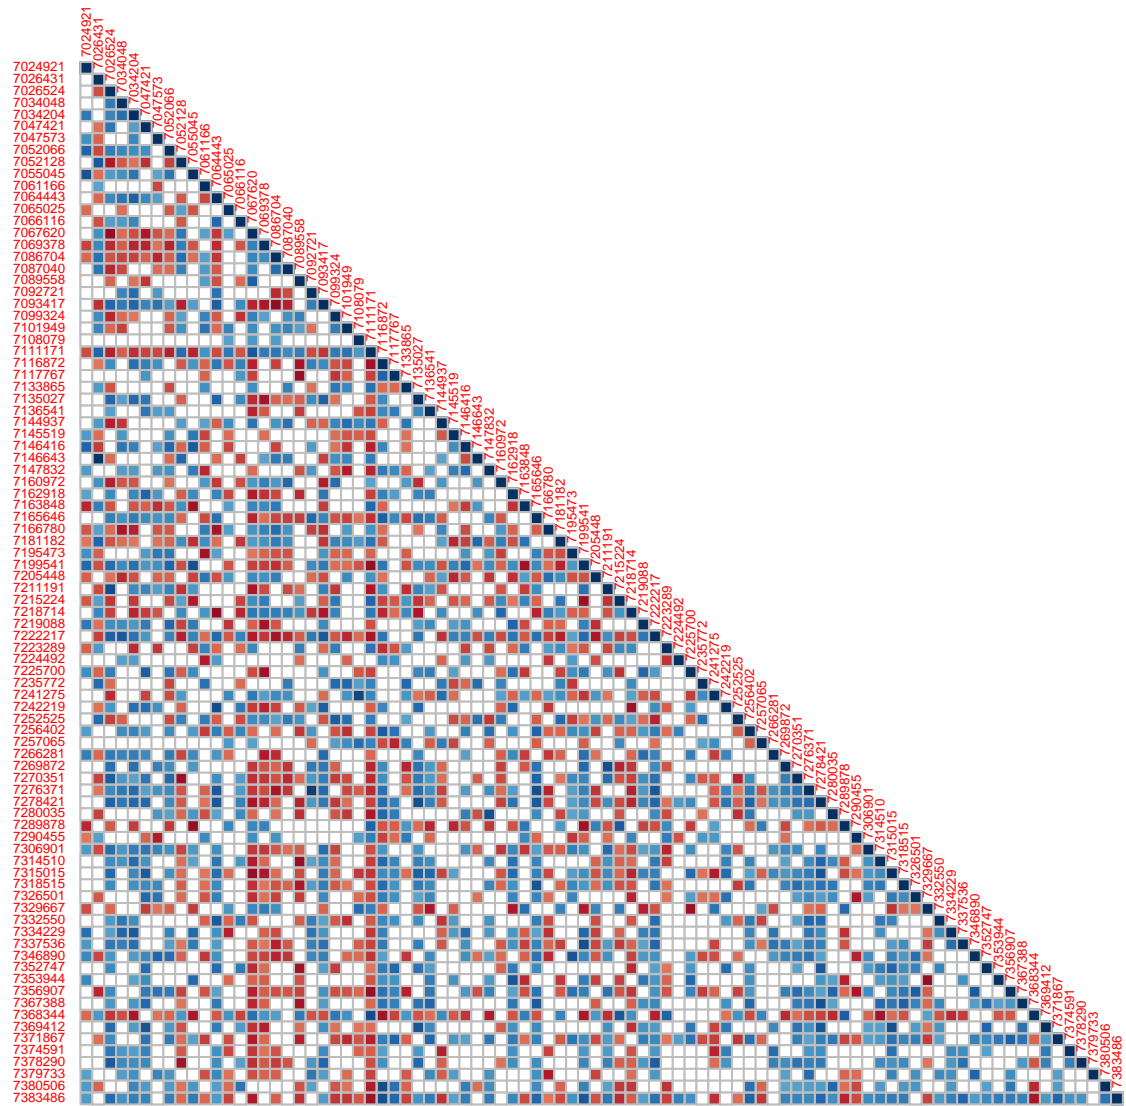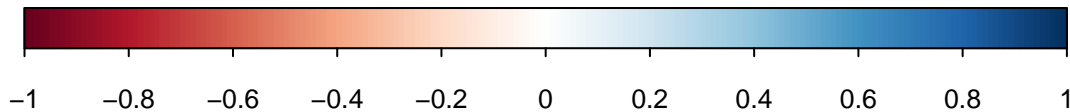

Supplement: 12868_2015_186_MOESM2_ESM.pdf [file 12868_2015_186_MOESM2_ESM.pdf]
